# Supplementary material
Source: HighWire-hosted journal article supplement (https://hw-f5-jim.highwire.org/content/jim-2021-001786)
Supplement: inline-supplementary-material-1 [file inline-supplementary-material-1.pdf]

**Table S1. C-statistic for logistic regression models comparing association of eGFR and ACR with risk of PAD**

| <b>Model</b>                  | <b>c statistic</b> | <b>p</b> |
|-------------------------------|--------------------|----------|
| eGFR                          | 0.73               | <0.001   |
| ACR                           | 0.72               | <0.001   |
| eGFR+ ACR                     | 0.73               | <0.001   |
| Interaction of eGFR and ACR † | 0.72               | <0.001   |
| Interaction of eGFR and ACR ‡ | 0.75               | <0.001   |

† cross-classified into 7 categories by ACR and eGFR while ACR < 30 mg/g or eGFR ≥ 90ml/min/1.73 m<sup>2</sup> defined as reference group  
‡ cross-classified into 12 categories by ACR and eGFR while ACR < 30 mg/g and eGFR ≥ 90ml/min/1.73 m<sup>2</sup> defined as reference group  
adjusted for age, Hypertension, Coronary artery disease, gender, DM duration, Smoking, Hyperlipidemia and HbA1C
